# Supplementary material
Source: Research Square preprint supplement (doi:10.21203/rs.3.rs-10000608/v1)
Supplement: Supplementary file 1 [file 01c16a92741adb6d19b35dff.xlsx]

## Sheet: Sheet1
Additional file 2. Vessel-type stratified adjusted hazard ratios for vascular access outcomes and all-cause mortality
Subgroup	Institution type	Outcome measure
		Primary patency			Secondary patency			VA malfunction			All-cause mortality
		HR	95% CI		HR	95% CI		HR	95% CI		HR	95% CI
			Lower	Upper		Lower	Upper		Lower	Upper		Lower	Upper
Autologous vessel	Tertiary	1			1			1			1
	General hospital	0.992	0.948	1.039	0.915	0.834	1.003	1.039	0.964	1.119	1.272	1.204	1.342
	Hospital	1.013	0.942	1.089	0.864	0.744	1.003	0.962	0.855	1.082	1.547	1.437	1.665
	Clinic	0.898	0.858	0.941	0.774	0.706	0.849	0.766	0.71	0.827	1.121	1.062	1.183
	Long-term care	0.982	0.91	1.06	0.899	0.769	1.05	0.822	0.72	0.937	2.916	2.736	3.108
Artificial vessel	Tertiary	1			1			1			1
	General hospital	1.094	1.006	1.189	1.167	0.998	1.366	1.205	1.065	1.363	1.236	1.119	1.365
	Hospital	1.149	1.014	1.301	1.227	0.974	1.546	1.172	0.976	1.407	1.537	1.348	1.751
	Clinic	1.019	0.939	1.106	0.945	0.808	1.106	0.954	0.843	1.08	1.091	0.989	1.204
	Long-term care	1.205	1.083	1.342	1.203	0.981	1.476	1.161	0.987	1.365	2.647	2.383	2.941
CI: confidence interval; HR: hazard ratio; VA: vascular access
