# Supplementary material
Source: Research Square preprint supplement (doi:10.21203/rs.3.rs-10000608/v1)
Supplement: Supplementary file 2 [file 3fcbbe29f85439c4e1bf298f.xlsx]

## Sheet: Sheet1
Additional file 1. Age-stratified adjusted hazard ratios for vascular access outcomes and all-cause mortality
Subgroup	Institution type	Outcome measure
		Primary patency			Secondary patency			VA malfunction			All-cause mortality
		HR	95% CI		HR	95% CI		HR	95% CI		HR	95% CI
			Lower	Upper		Lower	Upper		Lower	Upper		Lower	Upper
Under 40s	Tertiary	1			1			1			1
	General hospital	1.034	0.747	1.431	1.187	0.625	2.256	1.096	0.638	1.882	0.85	0.36	2.01
	Hospital	1.153	0.649	2.05	0.342	0.044	2.635	0.779	0.262	2.315	0.763	0.16	3.639
	Clinic	0.907	0.666	1.236	0.696	0.362	1.338	0.736	0.431	1.258	0.548	0.231	1.298
	Long-term care	1.158	0.461	2.911	1.192	0.155	9.192	2.472	0.822	7.433	1.081	0.133	8.779
40–49	Tertiary	1			1			1			1
	General hospital	1.033	0.851	1.254	1.248	0.831	1.873	1.049	0.78	1.413	1.175	0.726	1.903
	Hospital	1.141	0.842	1.547	0.858	0.408	1.803	1.054	0.661	1.68	1.176	0.57	2.428
	Clinic	0.986	0.817	1.189	1.205	0.811	1.791	0.759	0.561	1.026	0.869	0.531	1.423
	Long-term care	0.893	0.566	1.41	0.839	0.297	2.372	0.419	0.153	1.153	2.596	1.281	5.261
50–59	Tertiary	1			1			1			1
	General hospital	1.046	0.93	1.176	1.212	0.954	1.538	1.255	1.041	1.513	1.119	0.892	1.402
	Hospital	1.074	0.895	1.289	0.977	0.667	1.43	1.101	0.824	1.472	1.132	0.817	1.568
	Clinic	0.979	0.872	1.098	1.075	0.849	1.361	0.846	0.698	1.026	1.028	0.822	1.284
	Long-term care	0.99	0.78	1.255	1.252	0.797	1.967	0.795	0.523	1.209	1.984	1.441	2.733
60–69	Tertiary	1			1			1			1
	General hospital	1	0.919	1.089	0.924	0.778	1.098	1.09	0.954	1.246	1.172	1.022	1.343
	Hospital	0.952	0.832	1.089	0.837	0.636	1.103	0.891	0.717	1.108	1.399	1.164	1.682
	Clinic	0.911	0.838	0.99	0.807	0.68	0.957	0.829	0.725	0.949	1.085	0.947	1.242
	Long-term care	0.989	0.849	1.152	0.969	0.719	1.307	1.01	0.797	1.281	1.883	1.571	2.255
≥70	Tertiary	1			1			1			1
	General hospital	1.014	0.962	1.068	0.936	0.846	1.035	1.047	0.964	1.137	1.235	1.172	1.302
	Hospital	1.053	0.972	1.14	0.996	0.853	1.164	1.035	0.914	1.173	1.499	1.397	1.609
	Clinic	0.929	0.882	0.979	0.76	0.687	0.841	0.818	0.752	0.889	1.129	1.071	1.189
	Long-term care	1.047	0.974	1.126	0.928	0.805	1.071	0.919	0.816	1.034	2.522	2.379	2.673
CI: confidence interval; HR: hazard ratio; VA: vascular access
